# Supplementary material for: Up/down-converted green luminescence of Er3+–Yb3+ doped paramagnetic gadolinium molybdate: a highly sensitive thermographic phosphor for multifunctional applications
Source: Royal Society of Chemistry journal article supplement (doi:10.1039/c6ra20332a), 2016-01-01
Supplement: c6ra20332a1.pdf [file c6ra20332a1.pdf]

### Supplementary Figure

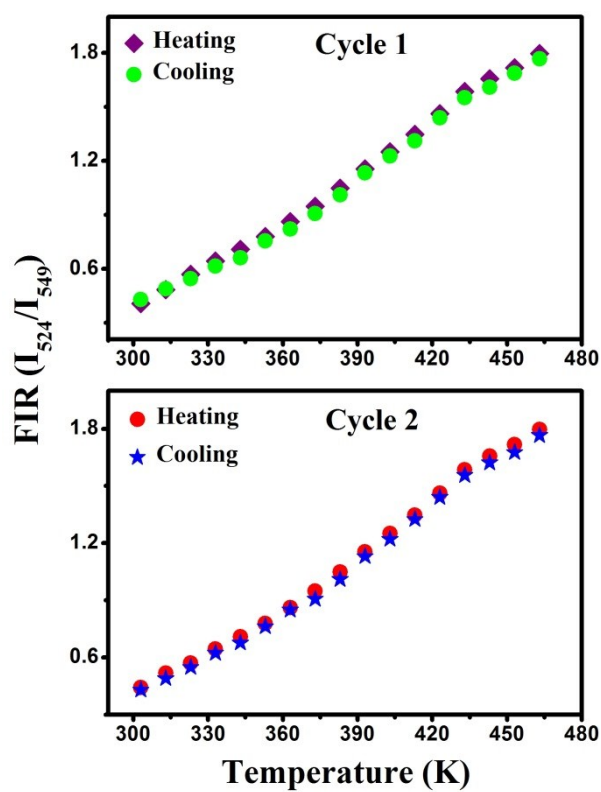

**Supplementary Fig. 1** FIR vs. Temperature graph for  $\text{Gd}_2\text{Mo}_3\text{O}_9: 0.3\% \text{Er}^{3+}/3\% \text{Yb}^{3+}$  sample for two heating-cooling cycles (two heating + two cooling).
